# Supplementary material for: Oral Microbiome Alterations Associated with Early Childhood Caries Highlight the Importance of Carbohydrate Metabolic Activities
Source: PubMed Central journal article supplement (PMC6832018; doi:10.1128/msystems.00450-19), 2019-11-05

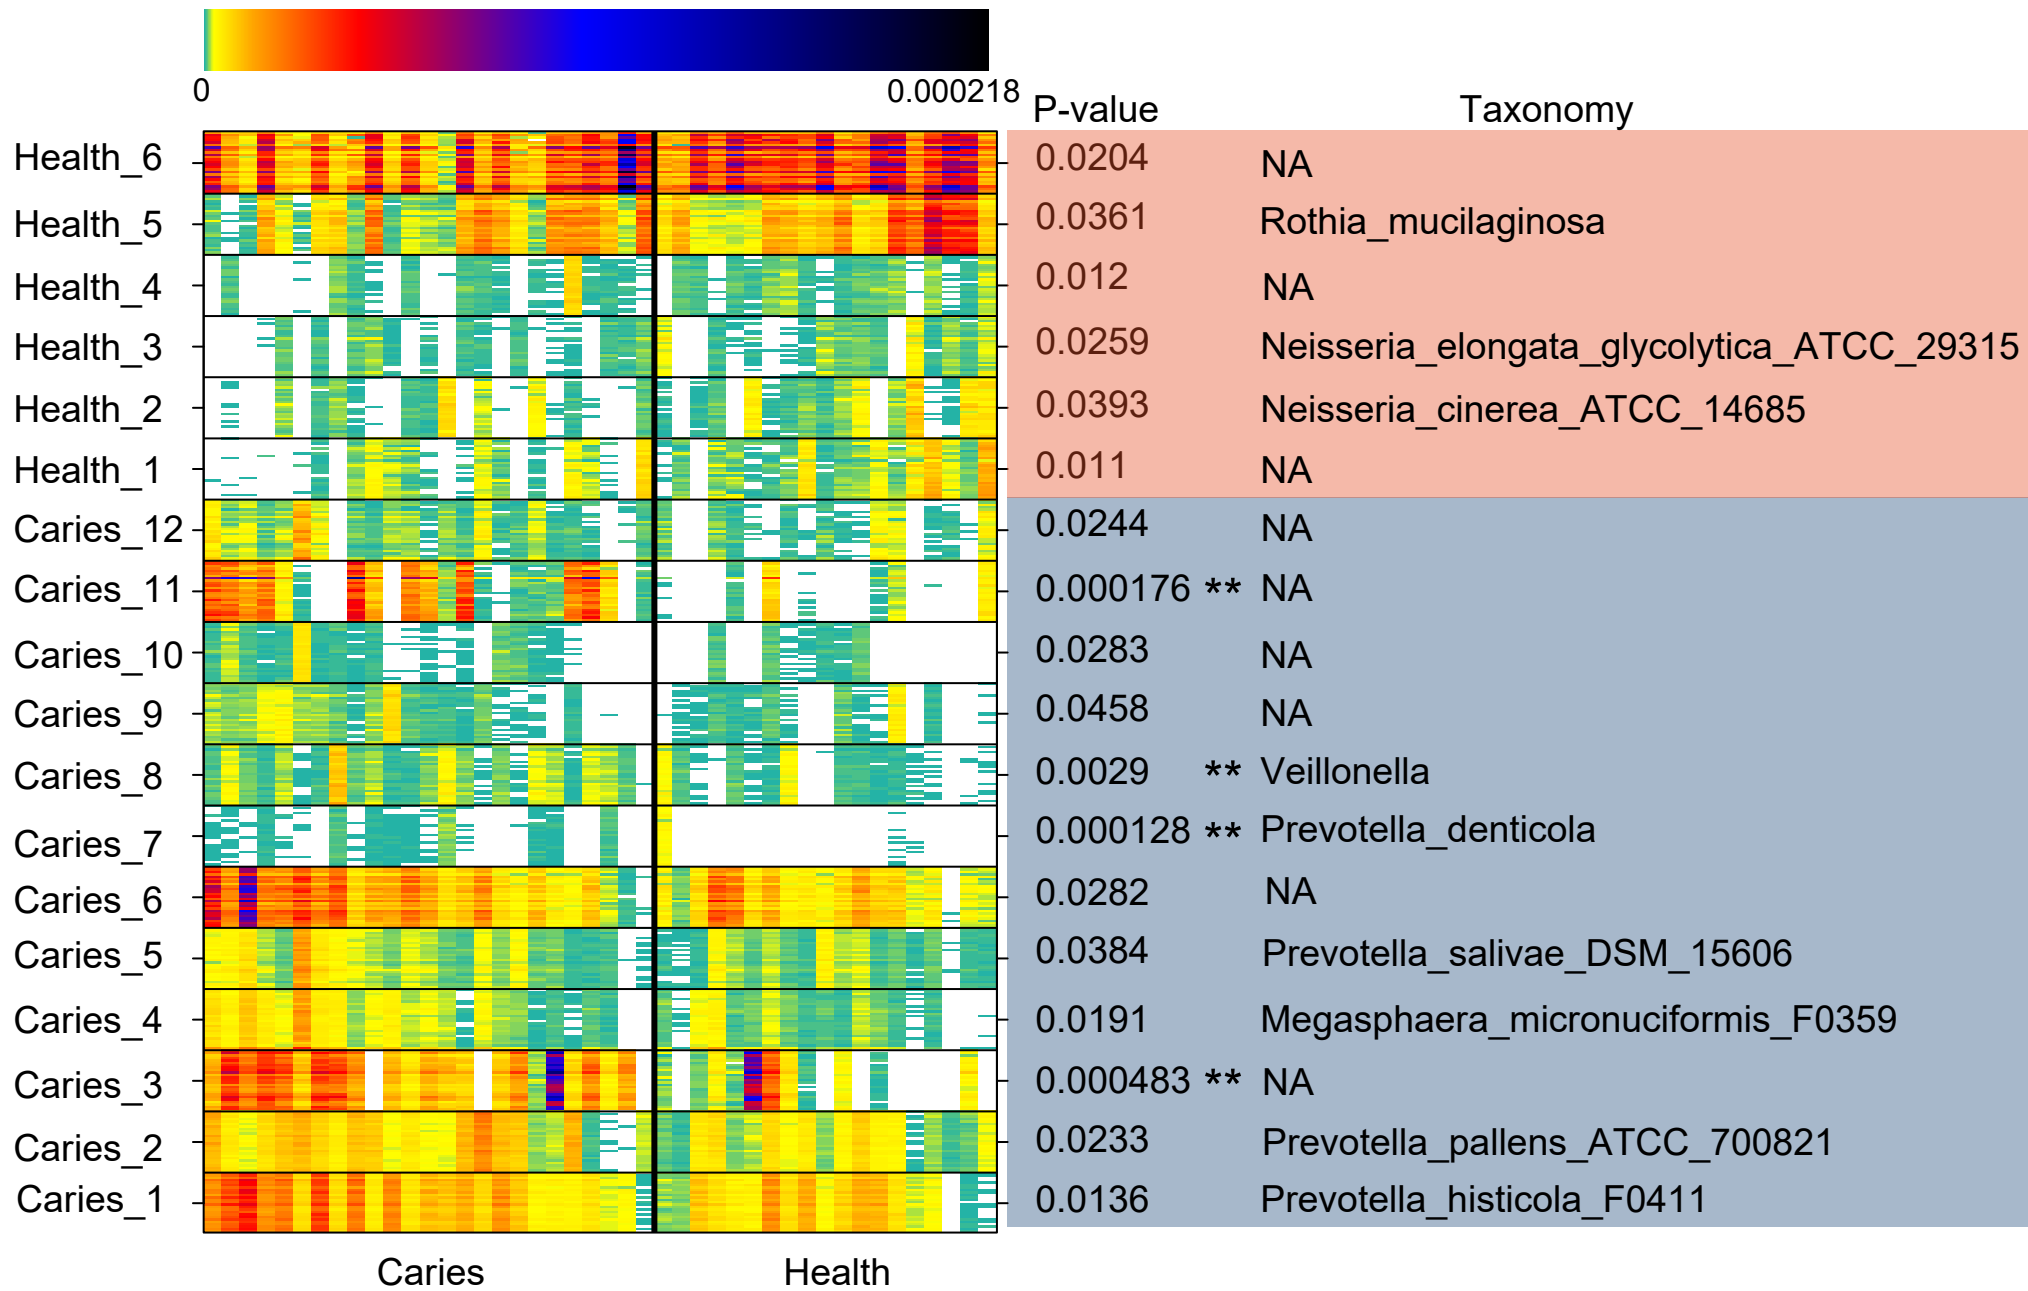

Supplement: mSystems.00450-19-sf002.pdf [file mSystems.00450-19-sf002.pdf]
